1                   **Penetration of Inner Scleral Fibers into Peripapillary**

2                   **Sclera Revealed by Polarization-Sensitive OCT**

3   Jianping Xiong<sup>1</sup>, MD, Hongshuang Lu<sup>1</sup>, MD, Nan Zhou<sup>1</sup>, MD, Yijin Wu<sup>1</sup>, MD,  
4   Masahiro Yamanari<sup>2</sup>, PhD, Hiroyuki Takahashi<sup>1</sup>, MD, PhD, Michiaki Okamoto<sup>2</sup>,  
5   BSc, Keigo Sugisawa<sup>1</sup>, MD, Takeshi Yoshida<sup>1,3</sup>, MD, PhD, Changyu Chen<sup>1</sup>,  
6   MD, Yining Wang<sup>1</sup>, MD, Ziyue Wang<sup>1</sup>, MD, Kyoko Ohno-Matsui<sup>1</sup>, MD, PhD

7   <sup>1</sup>Department of Ophthalmology and Visual Science, Institute of Science Tokyo,  
8   Tokyo, 113-8510, Japan

9   <sup>2</sup>Tomey Corporation, Nagoya, Aichi-ken, 451-0051, Japan

10   <sup>3</sup>Department of Advanced Ophthalmic Imaging, Institute of Science Tokyo,  
11   Tokyo, Japan

12   **Corresponding Author:** Professor Kyoko Ohno-Matsui, Department of

13   Ophthalmology and Visual Science, Institute of Science Tokyo, 1-5-45

14   Yushima, Bunkyo-ku, Tokyo 1138510, Japan; Phone: 81-3-5803-5302, Fax:

15   81-3-3818-7188,

16   e-mail: k.ohno.oph@tmd.ac.jp

17

18   **Running title:** Inner Scleral Penetration into Circular Pattern

19   **Word count:** 3255 words

20   **Key words:** peripapillary sclera, collagen, optic nerve, polarization-sensitive

21   optical coherence tomography, myopia

22 **Funding/Support:** This work was supported by JST SPRING, Grant Number  
23 JPMJSP2120, and received partial research funding from Tomey Corporation.  
24 The funding organization and Tomey Corporation had no role in the design and  
25 conduct of the study; collection, management, analysis, and interpretation of  
26 the data; preparation, review, or approval of the manuscript; and decision to  
27 submit the manuscript for publication.

28 **Conflict of Interest/Financial Disclosures:** Dr Xiong reported receiving a  
29 research grant from JST SPRING. Dr Ohno-Matsui reported receiving a  
30 research grant from Tomey Corporation and being a consultant for Santen and  
31 Cooper Vision outside the submitted work. Dr Yamanari reported having  
32 patents for JP 6463051 B2, US 9593936 B2, EP 2995245 B1, JP 6542178 B2,  
33 and JP 7332131 B2 issued to Tomey Corporation. Dr Yoshida belongs to the  
34 Department of Advanced Ophthalmic Imaging at the Institute of Science Tokyo,  
35 which is funded by NIDEK Corporation. No other disclosures were reported.  
36

37 **Abstract**

38 **Purpose:** To determine the structural characteristics of the peripapillary sclera  
39 in myopic eyes using polarization-sensitive optical coherence tomography  
40 (PS-OCT).

41 **Methods:** Patients with myopia who underwent PS-OCT imaging between  
42 April and June 2023 were studied. The intensity, optic axis, and birefringence  
43 of PS-OCT images were analyzed to determine the surface of the lamina  
44 cribrosa (LC). The direction and arrangement of the scleral collagen fibers in  
45 the peripapillary region and scleral ridge were determined.

46 **Results:** One hundred and ten eyes of 59 patients with myopia (mean axial  
47 length,  $30.00 \pm 1.98$  mm) were studied. The scleral fibers around the optic  
48 nerve were arranged circularly in all eyes regardless of the presence or size of  
49 the peripapillary atrophy. Inner scleral fibers that penetrated beneath this  
50 circular arrangement were detected in 98 eyes (89.1%). There was a Y-shaped  
51 split at the point of penetration in 77 eyes (70.0%). The integrity of the circular  
52 arrangement and penetrating scleral fiber complexes remained intact even in  
53 cases of severe peripapillary scleral deformation. A scleral ridge was identified  
54 in 27 eyes (24.5%), and it appeared as a full-thickness protrusion composed  
55 primarily of outer scleral fibers. The ridge was consistently located outside the  
56 circular arrangement.

57 **Conclusions:** The penetration of the radial inner scleral fibers into the circular  
58 arrangement and extension to the LC suggest that they act as stabilizing  
59 anchors for the circular structure. The differences of the scleral ridges from  
60 those in eyes with dome-shaped macula suggest that unique mechanisms  
61 cause the scleral differences.  
62

## 63 **Introduction**

64 The peripapillary sclera plays a critical role in the biomechanics of the eye.<sup>1-3</sup>

65 Its structure (shape and thickness) and material properties (stiffness,

66 brittleness, and compliance) affect the mechanical sturdiness of the optic

67 nerve (ON) significantly. These properties thereby affect its susceptibility to

68 increased intraocular pressure (IOP) and other internal and external

69 pressures.<sup>4</sup>

70

71 Earlier studies examined the structure of the peripapillary sclera by wide-angle

72 X-ray scattering (WAXS), small-angle light scattering (SALS), and second

73 harmonic generation microscopic images of normal human and rat eyes.<sup>5,6</sup>

74 These studies identified a key feature of the posterior scleral structure: a ring

75 of collagen fibers encircling the scleral canal. Gogola et al. used polarized light

76 microscopy (PLM) to show a radial arrangement of the inner scleral fibers and

77 circumferential arrangement of the outer scleral fibers. These findings were

78 consistent in humans, monkeys, pigs, cows, goats, and sheep<sup>7</sup>, and they have

79 greatly enhanced our understanding of the anatomy of the peripapillary sclera.

80

81 Polarization-sensitive optical coherence tomography (PS-OCT) is an

82 advanced OCT technology that uses polarized light as an additional image

83 contrast mechanism.<sup>8,9</sup> It uses the birefringent properties of the sclera to image

84 and quantify the variations of birefringence across different regions of the  
85 sclera. PS-OCT can also make visible the axis of orientation, or optic axis, of  
86 the birefringence associated with the direction of the fiber bundles.<sup>10</sup> Based on  
87 these capabilities of PS-OCT, Baumann et al.<sup>11</sup> in rats and Willemse et al.<sup>12</sup> in  
88 healthy humans eyes to confirm the peripapillary scleral 3D structure. Most  
89 earlier studies suggested that the radial inner scleral fibers terminated at the  
90 circular arrangement adjacent to the scleral canal.<sup>5-7,11-14</sup>

91  
92 The peripapillary circular scleral structure is known to provide protection and  
93 support to the ON.<sup>5,7,13,14</sup> Thus, Hua et al. created seven posterior pole models  
94 demonstrating that radial fibers also contribute to the support of the posterior  
95 ocular surface.<sup>1</sup> Most importantly, they demonstrated that the combination of  
96 the radial and circumferential fibers provided enhanced ON protection at  
97 elevated IOP. However, the structural relationship between the peripapillary  
98 scleral fibers of different orientations has not been well explored using *in vivo*  
99 imaging. This deficiency is due to the difficulties in obtaining detailed images of  
100 the peripapillary scleral structures *in vivo*. However, the choroidal thinning in  
101 myopic eyes facilitates the ability to record clear images of all the scleral layers  
102 by PS-OCT.

103

104 Thus, the purpose of this study was to determine the structural construction of  
105 the peripapillary sclera in myopic human eyes. To accomplish this, we  
106 analyzed the structure of the sclera in the PS-OCT images of myopic eyes.

107

## 108 **Methods**

109 The procedures used in this study conformed to the tenets of the Declaration  
110 of Helsinki and were approved by the Ethics Committee of the Institute of  
111 Science Tokyo (Science Tokyo). The procedures complied with the standards  
112 for case series studies which allowed us to present the results thoroughly and  
113 transparently.

114

115 We reviewed the medical records of highly myopic patients who had  
116 undergone PS-OCT examinations between April 1, 2023, and June 16, 2023 at  
117 the Advanced Clinical Center for Myopia at Science Tokyo. Cases with  
118 poor-quality PS-OCT images were excluded. All patients had undergone a  
119 comprehensive ophthalmological examination including measurements of the  
120 axial length (IOL Master; Carl Zeiss Meditec AG, Jena, Germany),  
121 best-corrected visual acuity (BCVA), refractive error (spherical equivalent),  
122 color fundus photography, and swept-source OCT (SS-OCT, Triton; Topcon,  
123 Tokyo, Japan).

124

## 125 **PS-OCT Examinations and Image Processing**

126 To assess the characteristics of the birefringence of the posterior segment of  
127 the eye, we developed a PS-OCT system using a swept-source laser centered  
128 at 1050 nm (ROCTIA, Tomey Corporation, Japan). The hardware of this  
129 system is commercially available in Japan. A comprehensive description of the  
130 technical concepts and the system has been presented.<sup>15,16</sup> Retinal images  
131 were obtained over scan areas of 81 mm<sup>2</sup> (9 × 9 mm) or 144 mm<sup>2</sup> (12 × 12 mm)  
132 using a raster scanning protocol with 1024 A-scans along the horizontal axis  
133 and 256 B-scans along the vertical axis. In addition, a 6-line radial scan  
134 protocol was also used. This system has an axial resolution of 7.3 μm with an  
135 axial measurement range of 4.49 mm.

136  
137 Already developed algorithms<sup>10,17-19</sup> were adapted to process the measured  
138 raster scan data that yielded the polarization-diverse OCT intensities<sup>20,21</sup>, local  
139 phase retardation or magnitude of birefringence, and the orientation of the  
140 optic axis (OA) of the birefringence. These examinations resulted in three  
141 corresponding images: referred to as the intensity, birefringence, and OA  
142 images. To further enhance the image quality, the axial pixel separation was  
143 increased which improved the performance in localization of the axially  
144 accumulated Jones matrix.<sup>10</sup> A necessary correction was used to resolve the  
145 OA at each axial depth.<sup>10</sup>

146

147 The birefringence of collagen fibers occurs when light passes obliquely or  
148 perpendicularly to the OA as in fundus imaging. This causes the collagen  
149 fibers to exhibit two refractive indices that alters the polarization state along the  
150 axial depth. In perfectly aligned fibers, the PS-OCT can mathematically  
151 determine the orientation of the OA on a plane perpendicular to the direction of  
152 the light.<sup>10</sup> However, scleral collagen fibers have an interwoven structure that  
153 exceeds the resolution of OCT,<sup>22</sup> and this results in a net birefringence from  
154 partially canceled birefringence of the individual fibers. PS-OCT provides  
155 depth-resolved measurements of this net birefringence *in vivo*. The OA, which  
156 corresponds to the preferential orientation of the net birefringence created by  
157 interwoven collagen fibers, reflects the preferential orientation of the fibers  
158 despite their complex interwoven structure.

159

160 For the data analysis, we processed the horizontal raster scan data and  
161 obtained three types of images with 256 cross-sections for each eye. The  
162 intensity images were used to locate the anterior surface of the lamina cribrosa  
163 (LC), the OA images were used to determine the direction of the scleral  
164 collagen fibers especially in the peripapillary area and at the scleral ridge. A  
165 scleral ridge was defined as an anterior protrusion of the sclera that is located  
166 temporal to the ON with a height greater than 150  $\mu\text{m}$ .<sup>23,24</sup> Radial scan images

167 centered on the ON were used to determine the presence and height of the  
168 ridge. More specifically, the ridge measurements were made along the  
169 horizontal meridian using built-in tools (ROCTIA, Tomey Corporation, Japan).  
170 Birefringence images were used to assist in determining the alignment of the  
171 scleral fibers. High birefringence corresponded to more aligned scleral fibers<sup>25</sup>,  
172 and low birefringence corresponded to less aligned scleral fibers such as  
173 interwoven fibers.

174

175 Streamline rendering is a method for viewing the vectorial data and effectively  
176 makes visible the orientation of fibrous tissues such as the OA. This technique  
177 has been applied to imaging the OA of the heart muscles, articular cartilage,  
178 and scleral collagen fibers using PS-OCT.<sup>10,18,26</sup> We used the ParaView  
179 software (version 5.12.0, Kitware Inc.) for volumetric streamline rendering of  
180 the OA following the methods of earlier research.<sup>10</sup> The streamline images  
181 obtained directly and showed clearly the course of the scleral fibers.

182

### 183 **Statistical Analyses**

184 Statistical analyses were performed using SPSS version 25.0 (IBM Corp.,  
185 2017. IBM SPSS Statistics for Windows, Version 25.0. Armonk, NY: IBM  
186 Corp.). Normally distributed data are expressed as the means  $\pm$  standard

187 deviations (SD), and non-normally distributed data are presented as medians  
188 with corresponding quartiles.

189

## 190 **Results**

191 One hundred and ten eyes of 59 patients with myopia that had undergone  
192 PS-OCT imaging at the Advanced Clinical Center for Myopia at Science Tokyo  
193 between April 1, to June 16, 2023, were studied. There were 35 women and 24  
194 men with a mean ( $\pm$  SD) age of  $55.1 \pm 10.2$  years and range of 26.8 to 76.3  
195 years. The mean axial length was  $30.00 \pm 1.98$  mm with a range of 24.63 to  
196 34.13 mm. The mean refractive error (spherical equivalent) was  $-13.24 \pm 4.62$   
197 diopters (D) with a range of -1.63 to -24.75 D excluding 30 eyes with an  
198 implanted intraocular lens (IOL) and 1 eye with a contact lens. The median  
199 best-corrected visual acuity (BCVA) was 0.0 logMAR units with a range -0.3 to  
200 1.0 logMAR units.

201

202 The *en face* OA images were revised by a one-dimensional moving average  
203 for the 15 axial pixels ( $67 \mu\text{m}$ ) in the scleral slab, and the resulting images  
204 showed that the fibers in the inner layer of the sclera were distributed radially  
205 (Figure 1). The inner and outer layers of the sclera could be clearly  
206 distinguished in the horizontal cross-sectional OA images. The collagen fibers  
207 of the inner and outer layers of the sclera surrounding the optic nerve (ON) had

208 different orientations: the inner scleral fibers extended radially from the ON to  
209 the periphery, while the outer scleral fibers were oriented vertically and  
210 obliquely (Figure S1).

211

### 212 **Circular arrangements of scleral fibers around optic nerve (ON)**

213 In the *en face* OA images, the scleral fibers were noted to be arranged  
214 circularly around the ON in all eyes. The size and shape of this circular  
215 arrangement were determined solely by the ON, irrespective of the presence  
216 or size of the peripapillary atrophy (PPA; Figure 1). Even in eyes with a large  
217 PPA or deformed optic discs, the circular arrangement remained confined to  
218 the area immediately surrounding the ON. The circular arrangement appeared  
219 to be a projection of the outer sclera at the edge of the ON in the OA images  
220 (Figures 2–5) as reported in an earlier study.<sup>12</sup> The fibers were composed  
221 essentially of the outer circumferentially oriented sclera fibers and were only  
222 seen and distinguishable in the OA images.

223

### 224 **Penetration of inner sclera fibers within and below the circular** 225 **arrangement**

226 We found in the OA image that the inner scleral fibers did not terminate outside  
227 the circular arrangement. In 98 of 110 eyes (89.1%), the inner scleral fibers  
228 penetrated beneath the circular arrangement (Figure 2). The penetrating fibers

229 ran toward the ON and probably toward the LC. In the remaining eyes, the  
230 penetration of the inner scleral fibers could not be detected because of an  
231 extremely tilted ON in 5 eyes, thick choroid in 4 eyes, and loss of the typical  
232 circular arrangement in 3 eyes.

233

234 Additionally, the inner scleral layer was observed to split axially into a Y-shape  
235 in 77 of 110 eyes (70.0%) at the initial point where the fibers penetrated the  
236 circular arrangement. However, in these eyes, the complete course of  
237 penetrating fibers was not consistently detected.

238

239 In representative cases (Figure 3), the superior branch passed over the body  
240 of the circular arrangement and extended toward the anterior portion of the LC.  
241 On the other hand, the inferior branch passed beneath the circular  
242 arrangement and extended into or beyond the LC.

243

244 The inner scleral layer was also found to split into three or more branches. It  
245 was not divided into only two fiber bundles but it could be further subdivided  
246 into thinner bundles. Notably, 73 of 110 eyes (66.4%) had at least one small  
247 superior penetrating branch with its complete course extending through the  
248 main body of the circular arrangement. Because each eye had 256 PS-OCT

249 image sections, some values overlapped, allowing a simultaneous detection of  
250 the above phenomena in a single eye.

251

252 In the birefringence images, all of the penetrating inner scleral fiber bundles  
253 had low birefringence.

254

### 255 **Resilience of circular and penetrating scleral fiber complexes**

256 We also observed that even in cases of severe deformation of the peripapillary  
257 sclera, the circular arrangements and the penetrating inner scleral fibers  
258 remained unaffected (Figure 4). Various peripapillary abnormalities including  
259 conus pits and scleral ridges were commonly observed in eyes with pathologic  
260 myopia. Conus pits are thought to originate from scleral stretch-associated  
261 schisis or openings for the short posterior ciliary arteries that form pit-like clefts  
262 in the adjacent scleral crescent.<sup>27,28</sup>

263

264 Scleral ridges are anterior protrusions of the sclera located temporal to the  
265 optic disc.<sup>23,28</sup> Among the 110 eyes, nine had conus pits with a circular  
266 arrangement around the ON in all of these eyes. In eight of them, the  
267 penetration of the inner scleral fibers remained in place, and one eye could not  
268 be examined in detail because of the loss of the typical circular arrangement.

269

270 **PS-OCT images of eyes with scleral ridge**

271 Scleral ridges were observed in 27 of 110 (24.5%) eyes. In all 27 eyes, the  
272 protrusions involved the entire scleral thickness rather than only the inner  
273 sclera (Figure 5). In addition, the ridges were composed mainly of outer scleral  
274 fibers rather than the inner scleral fibers. The ridges were always located  
275 outside the circular arrangement of the scleral fibers.

276

277 **Discussion**

278 The OA in the posterior sclera have been studied in rats, guinea pigs, and  
279 humans.<sup>10-12,25</sup> These images consistently revealed a two-layer structure in the  
280 peripapillary sclera: an inner layer of radial fibers and an outer layer of  
281 circumferential fibers. The OA images from PS-OCT were needed to show the  
282 scleral fiber alignment. This imaging approach showed a clear difference  
283 between the inner and outer scleral layers (Figure S1) which then provided  
284 valuable information on the physiological and pathological states of the sclera  
285 *in vivo*. Building on the results of our laboratory findings on the characteristics  
286 of dome-shaped maculas (DSMs),<sup>10</sup> we examined the fiber structure  
287 surrounding the ON in this study.

288

289 Our images showed a circular arrangement of the collagen fibers around the  
290 ON in all eyes, and they appeared as projections of the outer sclera at the

291 edge of the ON (Figures 2-5). The circumferential arrangement of the fibers  
292 around the ON has been documented earlier by *in vitro* using techniques such  
293 as WAXS<sup>5</sup>, SALS<sup>6</sup>, PLM<sup>7,13</sup>, and more recently by *in vivo* PS-OCT images.<sup>11,12</sup>  
294 The circumferential fibers adjacent to the ON form a proximal ring which we  
295 refer to as a circular arrangement. Our observations closely agree with  
296 previous findings, and the circular arrangement appeared more distinct and  
297 easier to identify in our cross-sectional OA images compared to those obtained  
298 by earlier algorithms.<sup>7,12,13</sup>

299

300 The schematic illustration in Figure S2 is based on our observations and  
301 shows the course of the peripapillary scleral fibers and the penetration pattern  
302 of the inner radial fibers. Previous histological studies reported that the outer  
303 sclera transitions into the dura mater while the inner sclera forms the LC and  
304 contributes to the pia mater.<sup>29,30</sup> On the other hand, the earlier studies reported  
305 that the radial inner fibers emerged outside the circular arrangement slightly  
306 farther from the optic canal.<sup>5-7,11-14</sup> However, how the inner sclera is  
307 connected to the LC has not been conclusively determined.

308

309 In 89.1% of the eyes studied, cross-sectional OA images showed that the inner  
310 radial scleral fibers penetrated beneath the circular arrangement and ran  
311 toward the ON and the LC (Figure 2). A Y-shaped split was seen in 70.0% of

312 eyes at the initial point of penetration. In addition, the radial fibers were seen to  
313 divide into multiple bundles, and 66.4% of the eyes had at least one fully  
314 visible superior bundle (Figures 3 and 4).

315

316 Our findings are the first detailing the unique patterns of inner scleral fibers  
317 that penetrated the ring and extended toward the ON rather than terminating  
318 outside. These findings provide new information on the contribution of the  
319 inner sclera to the formation of the LC. All penetrating bundles had low  
320 birefringence (Figures 2H, 2L, 3H, 3L, 4G), indicating less aligned and more  
321 interwoven scleral fibers.

322

323 The structural and functional relationships between the circumferential and  
324 radial fibers have not been determined. Ji et al. reported discrete LC insertions  
325 into the sclera with significant variations in the depth and quadrant  
326 distribution.<sup>31</sup> Our findings showed that the inner scleral fibers penetrated the  
327 circular arrangement and split into superior and inferior or multiple branches,  
328 and closely aligned with these depth-dependent variations in the LC insertions.

329 In addition, the inconsistent observations of this penetration across  
330 cross-sections reflect the discrete nature of the LC insertions. These spatial  
331 correlations strongly support our suggestion that the radial fibers of the inner  
332 sclera directly connect with the LC by this penetration mechanism. Most

333 previous studies focused on *en face* observations, with few employing  
334 continuous cross-sectional approaches by PS-OCT. Our study has bridged this  
335 methodological gap, leading to novel findings.

336

337 The circumferential fibers are widely accepted as protection for neural tissues  
338 by resisting canal expansion and providing structural support for the ON.<sup>5,7,13,14</sup>

339 Hua et al.<sup>1</sup> showed that the radial fibers reduced the displacement of the LC  
340 and the peripapillary scleral tension under elevated IOP through finite element  
341 models. The combination of radial and circumferential fibers protected the ON  
342 better than either alone.

343

344 The *en face* OA images showed that the size and shape of the circular  
345 arrangement depended exclusively on the ON, which was unaffected by the  
346 presence or size of PPA (Figure 1). Cross-sectional OA images showed that  
347 even significant deformations of the peripapillary sclera, such as a scleral pit,  
348 did not alter the integrity of the complexes of the circular arrangements and the  
349 penetrating inner scleral fibers (Figure 4). These findings suggested that the  
350 structural stability of the circular arrangement, and emphasized the critical  
351 support resulting from its interweaving with the penetrating fibers. The  
352 penetrating fibers may act as anchors, stabilizing the circular arrangement  
353 through a fabric-like interweaving which would provide mechanical support.

354

355 Scleral ridges were observed in 24.5% of eyes as full-thickness protrusions  
356 and were not limited to the inner sclera. They consisted primarily of outer  
357 scleral fibers (Figure 5). Previous research from our laboratory using PS-OCT  
358 showed that the inner scleral fibers aggregated without a thickening of the  
359 outer sclera in highly myopic eyes with DSM sites.<sup>10</sup> Although both scleral  
360 ridges and DSMs involved an inward protrusion of the sclera, their structural  
361 components were markedly different. The distinct compositions of the scleral  
362 abnormalities suggested different pathogenic mechanisms potentially requiring  
363 individualized management for each type of scleral abnormality.

364

365 Our study has several limitations. First, it included only myopic eyes and  
366 mostly highly myopic eyes as full-thickness scleral imaging was feasible only  
367 with significant choroidal thinning. Because scleral fiber penetrations were  
368 observed in most cases, we propose that the complexes likely represented a  
369 physiological structure in all eyes. Future basic studies are needed to confirm  
370 these findings. Second, the LC region was not suitable for study because of  
371 the spatially unresolved birefringent signals from the retinal nerve fibers.  
372 Consequently, a direct confirmation that the penetrating fibers form the LC was  
373 not achieved, but SS-OCT indirectly validated this relationship by locating the  
374 anterior surface of the LC. Third, the imaging principles of OA, relying on the

375 preferential orientation of net birefringence, could not fully represent the  
376 complex microstructure of the sclera, such as the individual collagen  
377 lamellae<sup>22</sup> and the waviness of the collagen fibers<sup>14</sup>. Fourth, consistent with  
378 Willemse et al.<sup>12</sup>, we also failed to detect regions of interweaving fibers  
379 throughout the scleral depth described by Gogola et al.<sup>7</sup> Last, the pia mater  
380 that is situated parallel to the incident light, could not be viewed through its OA,  
381 blocking an exploration of its relationship<sup>29,30</sup> with the inner radial scleral fibers.  
382 SS-OCT has difficulties in identifying the posterior LC surface, although some  
383 of the penetrating fibers appeared to extend posteriorly to the LC (Figure S2).  
384 These fibers possibly linked the inner scleral fibers to the formation of the pia  
385 mater. However, current technology cannot verify this. These technical  
386 limitations underscore the need for future advancements in the algorithms to  
387 optimize PS-OCT which would then enable a broader application in clinical  
388 practice.

389

390 In conclusion, we examined the structural characteristics of the peripapillary  
391 sclera by PS-OCT, and we found that the circular arrangement of the scleral  
392 fibers around the ON is stable. The inner radial fibers penetrate and extend  
393 toward the LC and act as anchors of the circular arrangement. Scleral ridges  
394 had distinct compositional differences compared to DSMs, suggesting that the

395 mechanisms underlying peripapillary scleral abnormalities differ from those in  
396 other regions. These findings offer insights for future clinical management.  
397

398 **References**

- 399 1. Hua Y, Voorhees AP, Jan NJ, et al. Role of radially aligned scleral  
400 collagen fibers in optic nerve head biomechanics. *Exp Eye Res.* Oct  
401 2020;199:108188. doi:10.1016/j.exer.2020.108188
- 402 2. Sigal IA, Ethier CR. Biomechanics of the optic nerve head. *Exp Eye Res.*  
403 Apr 2009;88(4):799-807. doi:10.1016/j.exer.2009.02.003
- 404 3. Safa BN, Wong CA, Ha J, Ethier CR. Glaucoma and biomechanics.  
405 *Curr Opin Ophthalmol.* Mar 1 2022;33(2):80-90.  
406 doi:10.1097/ICU.0000000000000829
- 407 4. Ren R, Wang N, Li B, et al. Lamina cribrosa and peripapillary sclera  
408 histomorphometry in normal and advanced glaucomatous Chinese  
409 eyes with various axial length. *Invest Ophthalmol Vis Sci.* May  
410 2009;50(5):2175-2184. doi:10.1167/iovs.07-1429
- 411 5. Pijanka JK, Spang MT, Sorensen T, et al. Depth-dependent changes in  
412 collagen organization in the human peripapillary sclera. *PLoS One.*  
413 2015;10(2):e0118648. doi:10.1371/journal.pone.0118648
- 414 6. Girard MJ, Dahlmann-Noor A, Rayapureddi S, et al. Quantitative  
415 mapping of scleral fiber orientation in normal rat eyes. *Invest*  
416 *Ophthalmol Vis Sci.* Dec 28 2011;52(13):9684-9693.  
417 doi:10.1167/iovs.11-7894

- 418 7. Gogola A, Jan NJ, Lathrop KL, Sigal IA. Radial and Circumferential  
419 Collagen Fibers Are a Feature of the Peripapillary Sclera of Human,  
420 Monkey, Pig, Cow, Goat, and Sheep. *Invest Ophthalmol Vis Sci*. Oct 1  
421 2018;59(12):4763-4774. doi:10.1167/iovs.18-25025
- 422 8. Baumann B. Polarization Sensitive Optical Coherence Tomography: A  
423 Review of Technology and Applications. *Appl Sci-Basel*. May  
424 2017;7(5)doi:ARTN 474  
425 10.3390/app7050474
- 426 9. de Boer JF, Hitzengerger CK, Yasuno Y. Polarization sensitive optical  
427 coherence tomography - a review [Invited]. *Biomed Opt Express*. Mar 1  
428 2017;8(3):1838-1873. doi:10.1364/BOE.8.001838
- 429 10. Ohno-Matsui K, Igarashi-Yokoi T, Azuma T, et al. Polarization-Sensitive  
430 OCT Imaging of Scleral Abnormalities in Eyes With High Myopia and  
431 Dome-Shaped Macula. *JAMA Ophthalmol*. Mar 7  
432 2024;doi:10.1001/jamaophthalmol.2024.0002
- 433 11. Baumann B, Rauscher S, Glosmann M, et al. Peripapillary rat sclera  
434 investigated in vivo with polarization-sensitive optical coherence  
435 tomography. *Invest Ophthalmol Vis Sci*. Oct 28 2014;55(11):7686-7696.  
436 doi:10.1167/iovs.14-15037
- 437 12. Willemse J, Grafe MGO, Verbraak FD, de Boer JF. In Vivo 3D  
438 Determination of Peripapillary Scleral and Retinal Layer Architecture

- 439           Using Polarization-Sensitive Optical Coherence Tomography. *Transl Vis*  
440           *Sci Technol.* Oct 2020;9(11):21. doi:10.1167/tvst.9.11.21
- 441    13.    Jan NJ, Lathrop K, Sigal IA. Collagen Architecture of the Posterior Pole:  
442           High-Resolution Wide Field of View Visualization and Analysis Using  
443           Polarized Light Microscopy. *Invest Ophthalmol Vis Sci.* Feb 1  
444           2017;58(2):735-744. doi:10.1167/iovs.16-20772
- 445    14.    Boote C, Sigal IA, Grytz R, Hua Y, Nguyen TD, Girard MJA. Scleral  
446           structure and biomechanics. *Prog Retin Eye Res.* Jan 2020;74:100773.  
447           doi:10.1016/j.preteyeres.2019.100773
- 448    15.    Yamanari M, Mase M, Obata R, et al. Melanin concentration and  
449           depolarization metrics measurement by polarization-sensitive optical  
450           coherence tomography. *Sci Rep.* Nov 11 2020;10(1):19513.  
451           doi:10.1038/s41598-020-76397-4
- 452    16.    Yamanari M, Uematsu S, Ishihara K, Ikuno Y. Parallel detection of  
453           Jones-matrix elements in polarization-sensitive optical coherence  
454           tomography. *Biomed Opt Express.* May 1 2019;10(5):2318-2336.  
455           doi:10.1364/BOE.10.002318
- 456    17.    Todorovic M, Jiao S, Wang LV, Stoica G. Determination of local  
457           polarization properties of biological samples in the presence of  
458           diattenuation by use of Mueller optical coherence tomography. *Opt Lett.*  
459           Oct 15 2004;29(20):2402-2404. doi:10.1364/ol.29.002402

- 460 18. Fan C, Yao G. Imaging myocardial fiber orientation using polarization  
461 sensitive optical coherence tomography. *Biomed Opt Express*. Mar 1  
462 2013;4(3):460-465. doi:10.1364/BOE.4.000460
- 463 19. Li Q, Karnowski K, Noble PB, et al. Robust reconstruction of local optic  
464 axis orientation with fiber-based polarization-sensitive optical  
465 coherence tomography. *Biomed Opt Express*. Nov 1  
466 2018;9(11):5437-5455. doi:10.1364/BOE.9.005437
- 467 20. Yamanari M, Lim Y, Makita S, Yasuno Y. Visualization of phase  
468 retardation of deep posterior eye by polarization-sensitive swept-source  
469 optical coherence tomography with 1-microm probe. *Opt Express*. Jul  
470 20 2009;17(15):12385-12396. doi:10.1364/oe.17.012385
- 471 21. Ueno Y, Mori H, Kikuchi K, Yamanari M, Oshika T. Visualization of  
472 Anterior Chamber Angle Structures With Scattering- and  
473 Polarization-Sensitive Anterior Segment Optical Coherence  
474 Tomography. *Transl Vis Sci Technol*. Dec 1 2021;10(14):29.  
475 doi:10.1167/tvst.10.14.29
- 476 22. Li Q, Karnowski K, Untracht G, et al. Vectorial birefringence imaging by  
477 optical coherence microscopy for assessing fibrillar microstructures in  
478 the cornea and limbus. *Biomed Opt Express*. Feb 1  
479 2020;11(2):1122-1138. doi:10.1364/BOE.382755

- 480 23. Xie S, Kamoi K, Igarashi-Yokoi T, et al. Structural Abnormalities in the  
481 Papillary and Peripapillary Areas and Corresponding Visual Field  
482 Defects in Eyes With Pathologic Myopia. *Invest Ophthalmol Vis Sci.* Apr  
483 1 2022;63(4):13. doi:10.1167/iovs.63.4.13
- 484 24. Xiong J, Du R, Xie S, et al. Papillary and Peripapillary Hemorrhages in  
485 Eyes With Pathologic Myopia. *Invest Ophthalmol Vis Sci.* Nov 1  
486 2022;63(12):28. doi:10.1167/iovs.63.12.28
- 487 25. Liu X, Jiang L, Ke M, et al. Posterior scleral birefringence measured by  
488 triple-input polarization-sensitive imaging as a biomarker of myopia  
489 progression. *Nat Biomed Eng.* Jun 26  
490 2023;doi:10.1038/s41551-023-01062-w
- 491 26. Yao G, Duan D. High-resolution 3D tractography of fibrous tissue based  
492 on polarization-sensitive optical coherence tomography. *Exp Biol Med*  
493 *(Maywood)*. Feb 2020;245(4):273-281.  
494 doi:10.1177/1535370219894332
- 495 27. Ohno-Matsui K, Lai TY, Lai CC, Cheung CM. Updates of pathologic  
496 myopia. *Prog Retin Eye Res.* May 2016;52:156-187.  
497 doi:10.1016/j.preteyeres.2015.12.001
- 498 28. Ohno-Matsui K, Akiba M, Moriyama M, et al. Acquired optic nerve and  
499 peripapillary pits in pathologic myopia. *Ophthalmology.* Aug  
500 2012;119(8):1685-1692. doi:10.1016/j.ophtha.2012.01.047

- 501 29. Hogan MJ, Alvarado JA, Weddell JE. *Histology of the Human Eye: An*  
502 *Atlas and Textbook*. Saunders; 1971.
- 503 30. Jonas JB, Spaide RF, Ostrin LA, Logan NS, Flitcroft I, Panda-Jonas S.  
504 IMI-Nonpathological Human Ocular Tissue Changes With Axial Myopia.  
505 *Invest Ophthalmol Vis Sci*. May 1 2023;64(6):5. doi:10.1167/iovs.64.6.5
- 506 31. Ji F, Islam MR, Wang B, Hua Y, Sigal IA. Lamina Cribrosa Insertions  
507 Into the Sclera Are Sparser, Narrower, and More Slanted in the Anterior  
508 Lamina. *Invest Ophthalmol Vis Sci*. Apr 1 2024;65(4):35.  
509 doi:10.1167/iovs.65.4.35

510

511

512 **Figure legends**

513

514 **Figure 1.** Circular arranged scleral fibers around the optic nerve (ON), and  
515 their relationship with the ON size rather than the peripapillary atrophic (PPA)  
516 size.

517 A: Fundus photograph of the right eye of a 71-75-year-old woman with a  
518 refractive error (spherical equivalent) of -7.6 diopters (D) and an axial length  
519 (AL) of 25.7 mm with a tessellated fundus. Scarred macular neovascularization  
520 can be seen.

521 B: *En face* optical coherence tomographic (OCT) intensity projection image  
522 shows a small PPA temporal to the ON.

523 C: The optic axis (OA) projection image has a circular arrangement of the  
524 scleral fibers around the ON (arrow). The circular arrangement exists just  
525 around the ON within the PPA. Outside the circular arrangement, the inner  
526 scleral fibers extend radially from the ON toward the fovea. The OA images (C,  
527 F, and I) are colored based on the color wheel in the lower right corner, with  
528 blue, yellow, pink, and green indicating the horizontal, vertical, and 2 oblique  
529 scanning directions, respectively.

530 D: Fundus photograph of the left eye of a 51-55-year-old woman with a  
531 refractive error of -17.8 D and an AL of 31.4 mm showing diffuse choroidal  
532 atrophy with large PPA.

533 E: *En face* OCT intensity projection image showing a large PPA.

534 F: OA projection image shows a relatively small circular arrangement just

535 around the ON (arrow) within the PPA.

536 G: Fundus photograph of the right eye of a 51-55-year-old man with a

537 refractive error of -10.6 D and an AL of 28.9 mm showing diffuse choroidal

538 atrophy.

539 H: *En face* OCT intensity image shows horizontally oval ON surrounded by

540 annular PPA.

541 I: OA projection image shows horizontally arranged oval fibers just around the

542 ON (arrow) within the PPA.

543

544 **Figure 2.** The circular arrangement of the scleral fibers around the optic nerve

545 (ON) consists of the outer sclera with the inner sclera penetrating through this

546 circle to continue toward the lamina cribrosa (LC).

547 A: Fundus photograph of the left eye of a 61-65-year-old man with an

548 implanted intraocular lens and an AL of 30.5 mm showing diffuse choroidal

549 atrophy. The black line is the scanned line for the PS-OCT images in B to H.

550 B:, C:, and D: Horizontal scan PS-OCT images across the fovea.

551 B: Intensity image.

552 C: OA image shows that the inner and outer layers of the sclera around

553 the ON have different orientations of the scleral fibers. The inner sclera is

554 composed mainly of radial fibers which are horizontally oriented in this  
555 cross-sectional image (blue; arrows). In contrast, the outer sclera is composed  
556 of circumferentially oriented fibers and is obliquely oriented in this section  
557 (mixed colors; arrowhead).

558 D: Birefringence image showing that the inner scleral fibers have high  
559 birefringence (arrows). Peripapillary structures outlined by the squares are  
560 magnified in images E to H.

561 E: to H: Magnified images of the squares in images B to D.

562 E: and F: Intensity images show the anterior surface of LC  
563 (arrowheads). Peripapillary sclera appears to protrude anteriorly (arrow).

564 G: In the OA image, the circular arrangement is located at the edge of  
565 the ON and is seen as the projection of the outer scleral fibers (white arrow). A  
566 penetration of almost the entire thickness of the inner sclera is observed (red  
567 arrow) beneath the circular arrangement and runs toward the LC.

568 H: In the birefringence image, the circular arrangement shows high  
569 birefringence (white arrow), while penetrating inner scleral fibers have low  
570 birefringence (red arrow).

571 I: to L: Peripapillary magnified PS-OCT images scanned at 235  $\mu\text{m}$  inferior to  
572 the scan line shown in A.

573 I: and J: Intensity images show the anterior surface of the LC  
574 (arrowheads). Peripapillary sclera appear to protrude anteriorly (arrow).

575           K: In the OA image, the circular arrangement is located at the edge of  
576 the ON and is seen as a projection of the outer sclera (white arrow). A  
577 penetration of almost the entire thickness of the inner sclera is observed (red  
578 arrow) beneath the circular arrangement and runs toward the LC.

579           L: In the birefringence image, the penetrating inner scleral fibers have  
580 low birefringence (red arrow).

581 The OA images (C, G, and K) are colored based on the color wheel in image C,  
582 with blue, yellow, pink, and green indicating the horizontal, vertical, and 2  
583 oblique scanning directions, respectively. The birefringence images (D, H, and  
584 L) are colored using the color bar in the upper right corner and are intentionally  
585 saturated to show the low birefringence structure more clearly.

586

587 **Figure 3.** The circular arrangement of the scleral fibers around the optic nerve  
588 (ON) consists of the outer sclera. The inner sclera can be seen to penetrate  
589 through this circle to continue toward the lamina cribrosa (LC). The color wheel  
590 and bar labeling are the same as in Figure 2.

591 A: Fundus photograph of the left eye of a 56-60-year-old woman with a  
592 refractive error of -19.0 D and an AL of 31.6 mm showing diffuse choroidal  
593 atrophy. Black line is the scanned line of PS-OCT images in B to H.

594 B:, C:, and D: PS-OCT images correspond to the scan line shown in A.

595           B: Intensity image.

596 C: OA image showing that the inner sclera is horizontally oriented in this  
597 cross-sectional image (blue; arrows). The outer sclera is generally vertical in  
598 this section (yellow; arrowhead).

599 D: Birefringence image shows that the inner scleral fibers are highly  
600 birefringent (arrows). Peripapillary structures in the squares are magnified and  
601 shown in images E to H.

602 E: to H: Magnified images of the squares in images B to D.

603 E: and F: Intensity images show the anterior surface of the LC  
604 (arrowheads).

605 G: In the OA image, the inner scleral fibers do not terminate outside the  
606 circular arrangement; they split in a Y-shape pattern and penetrate and extend  
607 toward the LC. More specifically, the superior branch (white arrow) passes  
608 through the body of the circular arrangement and runs toward the anterior part  
609 of the LC. The inferior branch (red arrow) passes beneath the circular  
610 arrangement and extends into or deeper into the LC.

611 H: Birefringence image showing that both the penetrating inner scleral  
612 fiber bundles have low birefringence (arrows).

613 I: to L: Peripapillary magnified images of PS-OCT images scanned at 47  $\mu\text{m}$   
614 inferior to the scan line shown in A.

615 I: and J: Intensity images show the anterior surface of the LC  
616 (arrowheads).

617           K: In the OA image, the superior branch (white arrow) of the split inner  
618 scleral fibers penetrates within the body of circular arrangement and runs  
619 toward the anterior part of the LC. The inferior branch (red arrow) passes  
620 beneath the circular arrangement and extends into or deeper into the LC.

621           L: Birefringence image. The circular arrangement shows high  
622 birefringence (arrowhead) but both of the penetrating inner scleral fiber  
623 bundles have low birefringence (arrows).

624

625   **Figure 4.** The inner scleral penetrating fibers remain even in eyes with a  
626 scleral conus pit. The color wheel and bar labeling are the same as in Figure 2.

627   A: Left fundus of a 71-75-year-old woman with an implanted intraocular lens  
628 and an AL of 34.9 mm. Multiple areas of patchy choroidal atrophy can be seen  
629 surrounding the macula. A large area of peripapillary atrophy (PPA) can be  
630 seen around the optic nerve (ON). The scleral ridge can be seen temporal to  
631 the ON (arrowheads). The solid and dotted lines show the locations of two  
632 PS-OCT scans.

633   B: *En face* OCT intensity image. Multiple conus pits can be clearly seen  
634 (arrowheads).

635   C: A horizontal scan of swept-source OCT image across the macula shows a  
636 large and deep conus pit (arrow). The sclera at the conus pit is posteriorly

637 bowed while the remaining retinal vessels remain protruded (arrowheads).

638 Macular sclera shows a dome-shaped macula (DSM) appearance.

639 D: to G: PS-OCT images corresponding to the dotted scan line shown in A.

640 D: The intensity image shows a deep conus pit (arrow). DSM is also  
641 seen.

642 E: OA images. The inner scleral layer (arrowheads) is thick at the DSM  
643 and continues until the conus pit (arrow).

644 F: This is a magnified image of the square area in E. A projection of the  
645 outer scleral oblique fibers is seen just around the ON (white arrow).

646 Penetration of horizontally running fibers just below the circular arrangement  
647 (red arrow) is seen toward the ON.

648 G: Birefringence image shows high birefringence at the circular  
649 arrangement around the ON (white arrow) while penetrating inner scleral fibers  
650 show low birefringence (red arrow).

651 H: to M: PS-OCT images corresponding to the solid scan line shown in A.

652 H:, I:, and J: Intensity images. A conus pit is seen (arrow in H). I and J  
653 are the same magnified images of square area in H. The anterior surface of  
654 the LC is shown (arrowheads in J).

655 K: OA images. A conus pit is seen (arrow in K). L and M are the same  
656 magnified images of the square area in K.

657 L: Inner scleral layer is thin in this scan and ends before the conus pit.

658 However, just around the ON, the projection of outer sclera (consisting of

659 circular arranged fibers) is seen (arrow).

660 M: The inner scleral fibers that penetrate the circular arrangement

661 remain in place (two branches; blue and red arrows). The superior branch

662 (blue arrow) passes through the body of the circular arrangement and runs

663 toward the anterior part of the LC, and the inferior branch (red arrow) passes

664 beneath the circular arrangement and extends into or beneath the LC.

665

666 **Figure 5.** PS-OCT images of an eye with a scleral ridge. The color wheel and

667 bar labeling are the same as in Figure 2.

668 A: Left fundus of a 36-40-year-old woman with a refractive error of -17.4 D and

669 an AL of 30.8 mm showing diffuse choroidal atrophy. Peripapillary atrophy is

670 seen temporal to the optic nerve (ON). A scleral ridge can be seen temporal to

671 the ON (arrowheads). The black line is the scanned line of the PS-OCT images

672 in B to F.

673 B: and C: In the intensity images of PS-OCT, the scleral ridge is clearly seen

674 (white arrow). A magnified image of the square is shown in C. A slight

675 protrusion of the sclera is also seen just around the ON (blue arrow).

676 D: and E: In the OA images, the scleral ridge is seen as a protrusion of the

677 entire scleral thickness rather than just the inner sclera. The scleral ridge is

678 composed primarily of the outer rather than the inner scleral fibers. In the  
679 magnified image E, the scleral ridge is located outside the circular  
680 arrangement (white arrow). The inner sclera over the ridge is significantly  
681 thinned (arrowheads). There is another protrusion just around the ON which is  
682 the circular arrangement of the scleral fibers (blue arrow). The inner scleral  
683 fibers that penetrate posterior to this circle can also be seen (red arrow).  
684 F: Birefringence image of the same area. Scleral ridge and the circular  
685 arrangement have generally high birefringence.  
686

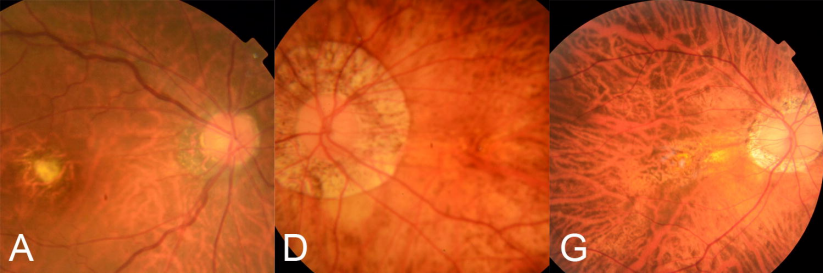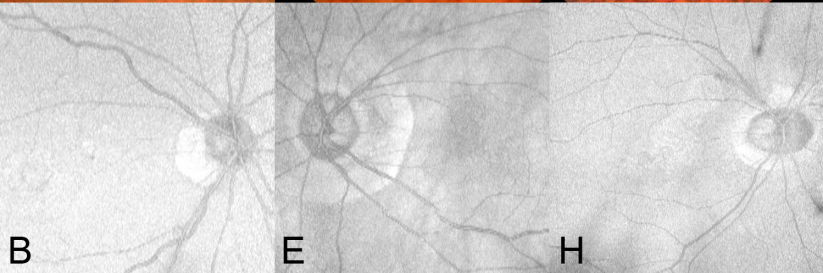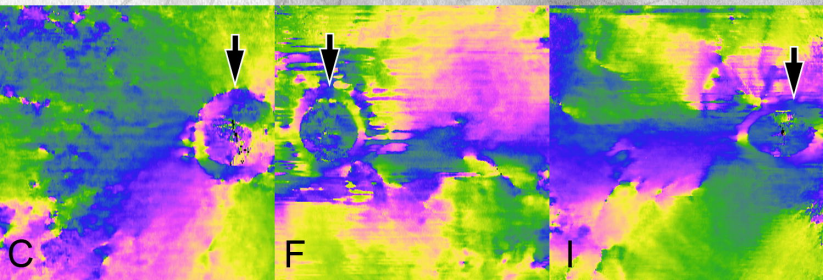

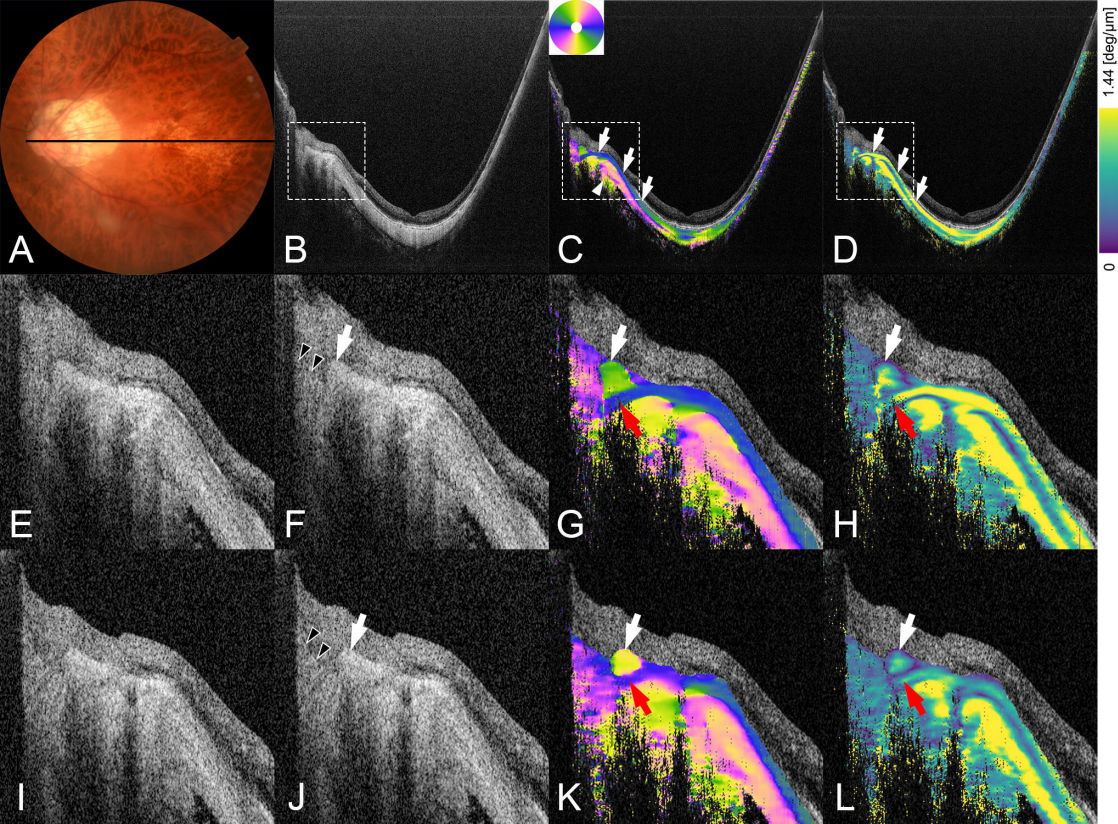

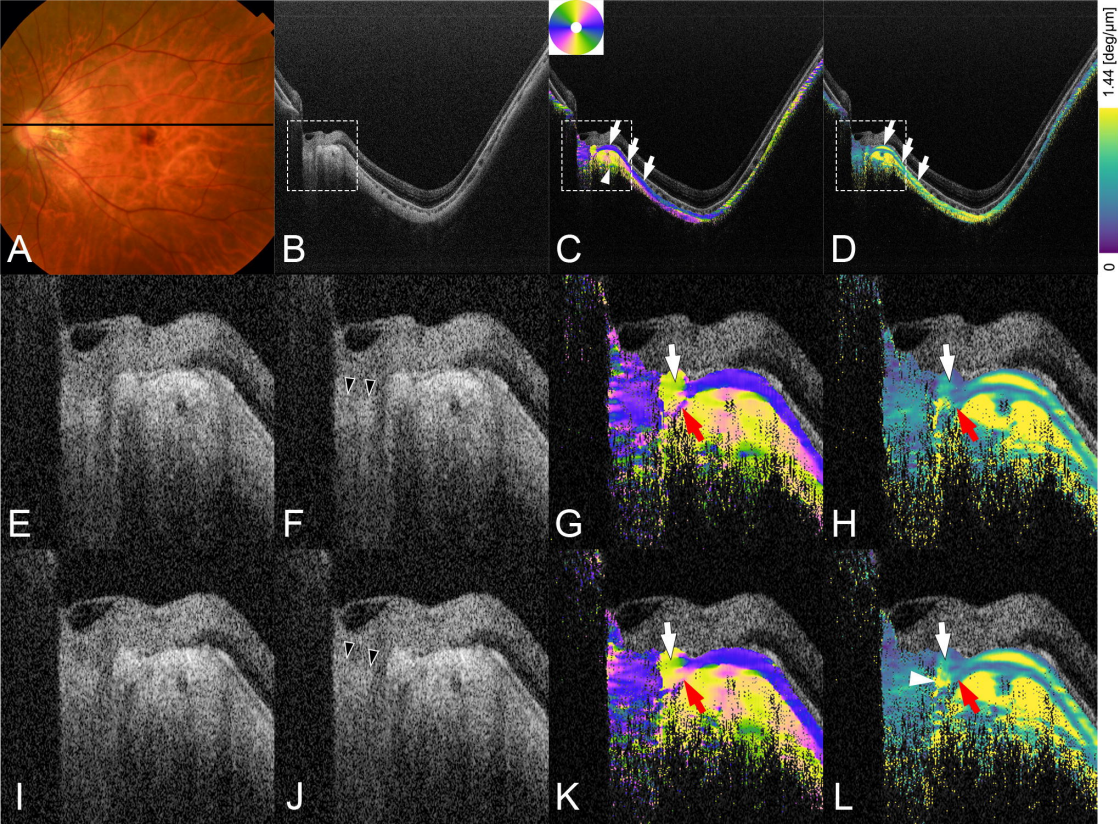

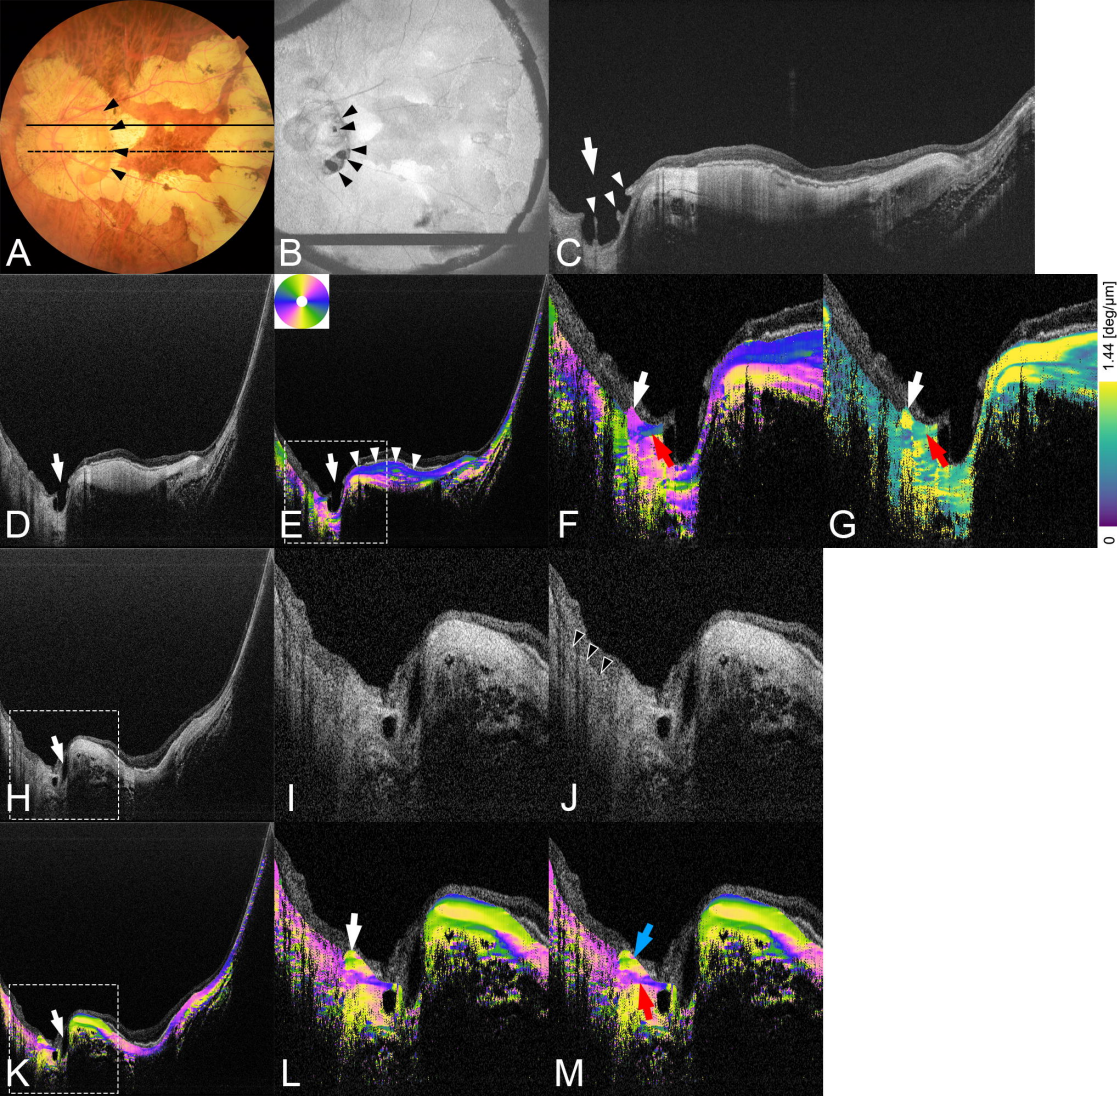

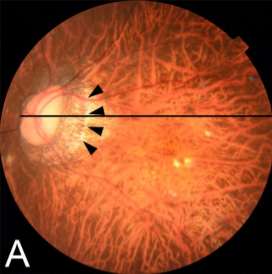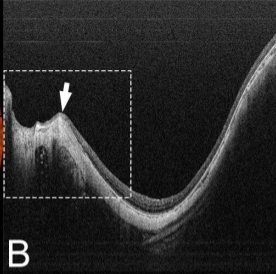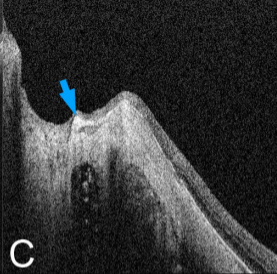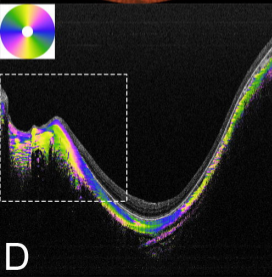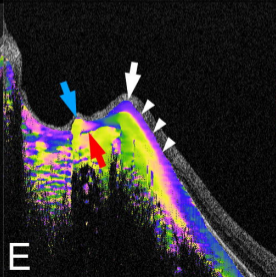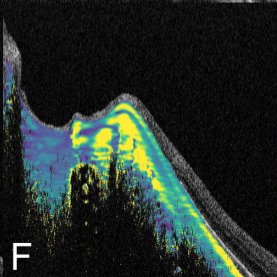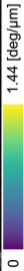

Source: https://www.medrxiv.org/content/10.1101/2025.02.22.25322543v1.full.pdf
